1 **The role of the eipeptide EpeX in defining competitive fitness**  
2 **in intra-species mixed isolate colony biofilms of *Bacillus***  
3 ***subtilis***  
4

5

6 Margarita Kalamara<sup>1</sup>, James Abbott<sup>2</sup>, Tetyana Sukhodub<sup>1</sup>, Cait MacPhee<sup>3</sup>, Nicola R.  
7 Stanley-Wall<sup>1</sup>

8

9 <sup>1</sup> Division of Molecular Microbiology, School of Life Sciences, University of Dundee, Dundee,  
10 DD5 4EH, UK

11 <sup>2</sup> Data Analysis Group, Division of Computational Biology, School of Life Sciences,  
12 University of Dundee, Dundee, DD5 4EH, UK

13 <sup>3</sup> National Biofilms Innovation Centre, School of Physics & Astronomy, University of  
14 Edinburgh, EH9 3FD Edinburgh, UK

15

16 **For contact:** Prof Nicola Stanley-Wall [n.r.stanleywall@dundee.ac.uk](mailto:n.r.stanleywall@dundee.ac.uk)

17 **Keywords:** *Bacillus subtilis*, biofilm, kin discrimination, eipeptide, EpeX

18 **Repositories:** ENA Project PRJEB43128

19 **Abstract**

20 Bacteria engage in competitive interactions with neighbours that can either be of the  
21 same or different species. Multiple mechanisms are deployed to ensure the desired  
22 outcome and one tactic commonly implemented is the production of specialised  
23 metabolites. The Gram-positive bacterium *Bacillus subtilis* uses specialised  
24 metabolites as part of its intraspecies competition determinants to differentiate  
25 between kin and non-kin isolates. It is, however, unknown if the collection of  
26 specialised metabolites defines competitive fitness when the two isolates start as a  
27 close, interwoven community that grows into a densely packed colony biofilm.  
28 Moreover, the identity of the most effective specialised metabolites has not been  
29 revealed. Here, we determine the competition outcomes that manifest when 21  
30 environmental isolates of *B. subtilis* are individually co-incubated with the model  
31 isolate NCIB 3610 in a colony biofilm. We correlated these data with the suite of  
32 specialised metabolite biosynthesis clusters encoded by each isolate. We found that  
33 the *epeXEPAB* gene cluster correlated with a strong competitive phenotype. This  
34 cluster is responsible for producing the eipeptide EpeX. We demonstrated that  
35 EpeX is a competition determinant of *B. subtilis* in an otherwise isogenic context.  
36 When we competed the NCIB 3610 EpeX deficient strain against our suite of  
37 environmental isolates we found that the impact of EpeX in competition is isolate-  
38 specific, as only one of the 21 isolates showed increased survival when EpeX was  
39 lacking. Taken together, we have shown that EpeX is a competition determinant  
40 used by *B. subtilis* that impacts intra-species interactions in an isolate-specific  
41 manner.

## 42 **Introduction**

43 Kin discrimination is the ability of individuals to discriminate against conspecific  
44 organisms based on phylogenetic relatedness, such that neighbouring cells with the  
45 closest phylogenetic relationship cooperate more than those that are more distantly  
46 related (1-3). It is believed that this behaviour has evolved to stabilise cooperation  
47 between isolates that share the same genes for cooperative traits (1-3) and exclude  
48 the more distantly related, thereby avoiding exploitation of communal secreted  
49 molecules by potential non-contributing neighbours (4, 5) and in doing so releasing  
50 nutrients and genetic material that can be scavenged (6).

51 The Gram-positive soil-dwelling bacterium *Bacillus subtilis* exhibits kin discrimination  
52 (7) and it is mediated by a combinatorial process where multiple genetic loci define  
53 the relationship between isolates. These loci primarily comprise genes encoding the  
54 production and response to antimicrobials and cell surface-modifying molecules (8).  
55 An experimental system that has been deployed to define the molecular basis for kin  
56 discrimination is the “swarm meeting assay”, where different isolates move (swarm,  
57 (9)) towards each other on a semi-solid surface from initially distinct inoculation  
58 positions. Kin strains are those that can intermingle, and non-kin strains are those  
59 that form a clearance zone between them (7).

60 Some of the molecules involved in kin discrimination are specialised metabolites,  
61 (also known as secondary metabolites) which are a diverse class of bioactive  
62 molecules (10). Specialised metabolites produced by *B. subtilis* that are involved in  
63 kin discrimination are sporulation-killing factor, subtilosin A, bacillaene, and  
64 sublancin 168 (8). The role of these specialised metabolites in intra-species  
65 interactions was strengthened by an examination of the growth inhibitory properties  
66 when a focal strain is grown in at a higher density on the surface of a lawn of the  
67 target strain. A correlation was drawn between isolates encoding different  
68 biosynthetic gene clusters and competition outcome (11). However, this correlation  
69 was not perfect, as in some cases isolates encoding the same suite of biosynthetic  
70 gene clusters could still inhibit the growth of each other (11). These analyses  
71 highlight the complexities in defining the outcome of intra-species interactions.

72 In this work, we were interested in understanding the molecules that govern the  
73 competitive dynamics of isolates growing within the same niche, a mixed isolate  
74 colony biofilm. Competitive fitness in a spatially constrained mixed community is

75 known to be impacted by the spatial arrangement of the founding cells (12, 13) and  
76 by the presence of polymorphic toxins (14). However, knowledge surrounding the  
77 role that specialised metabolites play in shaping these interactions in mixed  
78 communities is lacking. Here, to address this knowledge gap, we set out to explore  
79 the relationship between the suite of specialised metabolite biosynthesis clusters  
80 (SMBC) encoded by 21 soil isolates of *B. subtilis* and the model isolate NCIB 3610  
81 and their pairwise competitive fitness within colony biofilms. We obtained complete  
82 whole genome sequence data and detected the SMBC within all 22 genomes. We  
83 next correlated the presence of the accessory SMBCs with the competitive fitness of  
84 the isolates relative to the model isolate NCIB 3610. We identified that the SMBC  
85 whose presence most closely correlated with a strong competitive phenotype was  
86 the *epeXEPAB* cluster, which is responsible for the production of the epipeptide  
87 EpeX. We explored the role of EpeX in competitive fitness by constructing a deletion  
88 mutant of the biosynthetic cluster in the model isolate NCIB 3610. We found that, in  
89 an otherwise isogenic context, EpeX is an important determinant of competitive  
90 fitness, with the strain encoding the cluster occupying a higher proportion of the  
91 mixed community when compared with the NCIB 3610 EpeX deficient mutant. When  
92 testing the generality of EpeX as an intra-species competition determinant, we  
93 identified one isolate within our suite of 21 isolates that exhibited increased survival  
94 when competed with the EpeX deficient strain of NCIB 3610 rather than the NCIB  
95 3610 parental strain. Additionally, when exploring the role that EpeX has as a  
96 competition determinant in other isolates, we found that absence of the *epeXEPAB*  
97 cluster does not impact competitive fitness in two other soil isolates. In combination,  
98 our results reveal EpeX as a competition determinant of intra-species interactions  
99 but caution that the role it plays has an isolate-specific context.

## 100 **Methods**

### 101 **Growth conditions and strains used**

102 All strains used in this study are listed on Table 1. For routine growth of *Bacillus*  
103 *subtilis* and *Escherichia coli* strains, lysogeny broth (LB) liquid media was made  
104 using the following recipe: 1% (w/v) Bacto-peptone, 1% (w/v) NaCl, 0.5% (w/v) yeast  
105 extract. For solid plates, LB broth was supplemented with 1.5% (w/v) agar. The LB  
106 was sterilised by autoclaving. When necessary, LB media cultures and plates were  
107 supplemented with antibiotics which were used at the following concentrations for *B.*  
108 *subtilis*: 10 µg/ml kanamycin, 100 µg/ml spectinomycin and 5 µg/ml chloramphenicol.  
109 For growth of *E. coli* carrying plasmids of interest, the LB plates and liquid media  
110 were supplemented with 100 µg/ml of ampicillin, or 25 µg/ml chloramphenicol as  
111 required. Biofilm assays were conducted using MSgg (Minimal Salts glycerol  
112 glutamate) media. MSgg was made by first making a base medium, consisting of 5  
113 mM potassium phosphate, 100 mM MOPS at pH 7.0, supplemented with 1.5% (w/v)  
114 agar. The media base was autoclaved and cooled to 55°C. The base medium was  
115 supplemented with 2 mM MgCl<sub>2</sub>, 700 µM CaCl<sub>2</sub>, 50 µM FeCl<sub>3</sub>, 50 µM MnCl<sub>2</sub>, 1 µM  
116 ZnCl<sub>2</sub>, 2 µM thiamine, 0.5% (v/v) glycerol and 0.5% (w/v) glutamic acid. A volume of  
117 23 ml of MSgg melted media was added to each 9 cm diameter petri dish and the  
118 plates were solidified at room temperature. The surface of the solid plates was dried  
119 for 1 hour under a laminar flow cabinet prior to use in experiments.

### 120 **Strain construction**

121 The strain used for storing of plasmids for cloning was *Escherichia coli* strain  
122 MC1061 [F' *lacIQ lacZM15 Tn10 (tet)*]. For making mutations in the NCIB 3610  
123 background, as this strain is not genetically competent, plasmids were first  
124 transformed into the laboratory strain 168 through using standard protocol (15). The  
125 modified region was subsequently inserted and integrated into the NCIB 3610  
126 genome via SPP1 phage transduction (16). For genetically competent soil isolates of  
127 *B. subtilis*, the plasmids were transformed directly into the isolate of interest as  
128 previously described (17) with the adaptations described in (18).

129 The *epeXEPAB* deletions in the *B. subtilis* isolates were constructed by homologous  
130 recombination and insertion of a kanamycin resistance cassette in the native locus,  
131 using plasmid pNW2315. For construction of pNW2315 the required fragment was  
132 synthesised by GenScript and inserted into the pCC1 vector. The construct

133 sequence can be found in Table S1. Strains with the *epeXEPAB* deletion were  
134 verified by using the primers NRS2812 (5' GTCTCGTATAATCTCTCACTTTCCC 3')  
135 and NRS3311 (5' AGTAAGTGGCTTTATTGATCTTGGG 3').

136 For construction of the mTagBFP and GFP-expressing isolates, plasmids pNW2304  
137 (12) and pBL165 (19) were used respectively. Both plasmids are designed to  
138 facilitate the integration of the genes encoding the fluorescent proteins and antibiotic  
139 resistance cassettes into the *amyE* locus. Resulting colonies were therefore  
140 screened using a potato starch assay to assess loss of amylase activity (20) and  
141 expression of the appropriate fluorescent protein.

### 142 **Biofilm co-culture assays**

143 The mixed biofilm assays were set up as previously described (12). Cultures of the  
144 individual strains to be used were set up in 5 ml of LB and incubated at 37°C with  
145 agitation overnight. The following morning, day cultures were set up by inoculating 3  
146 ml of LB with 200 µl of the overnight cultures. The day cultures were incubated at  
147 37°C with agitation. The growth of the cultures was monitored, and all cultures were  
148 normalised to an OD<sub>600</sub> of 1. After normalisation, cultures were mixed at a 1:1 ratio  
149 as required. 5 µl drops of the culture mixtures were spotted onto MSgg agar plates  
150 and 5 µl drops of the individual normalised cultures were included in the assays as  
151 controls. The plates were incubated at 30°C and images were taken after 24, 48 and  
152 72 hours as required. Fluorescence imaging was performed using a Leica  
153 fluorescence stereoscope (M205FCA) with a 0.5 × 0.2 NA objective. Imaging files  
154 were imported to OMERO (21).

### 155 **Image analysis**

156 Relative strain densities of GFP and mTagBFP-expressing cells in mixed biofilm  
157 assays were determined by analysing fluorescent imaging data. This was done using  
158 a macro which was kindly produced by Dr. Graeme Ball at the Dundee Imaging  
159 Facility. Fiji/ImageJ (11, 12) was used to run the macro as previously described in  
160 our publication (12). Figures were constructed using GraphPad prism 7.

### 161 **Enhanced whole genome sequencing**

162 Enhanced whole genome sequencing was performed by MicrobesNG. This required  
163 a combination of Illumina short-read data acquisition and nanopore sequencing for  
164 long-read data. For the preparation of samples in the lab, a single colony of each  
165 strain to be sequenced was resuspended in 200 µl of sterile PBS buffer and 100 µl of



166 this was used to inoculate 300 ml of LB broth. The remaining 100  $\mu$ l was streaked on  
167 an LB agar plate, which was incubated at 37°C overnight. The 300 ml culture was  
168 incubated at 16°C with shaking overnight. The following morning, the culture was  
169 incubated at 37°C with shaking and the OD<sub>600</sub> was monitored. When cultures had  
170 reached an OD<sub>600</sub> value of between 0.5 and 0.8, they were centrifuged at 3,750 rpm  
171 for 10 minutes. The supernatant was removed, and the pellets were resuspended in  
172 a tube with a cryopreservative (Microbank™, Pro-Lab Diagnostics UK, United  
173 Kingdom) or with DNA/RNA Shield (Zymo Research, USA) following MicrobesNG  
174 strain submission procedures. The weight of the pellet required for *B. subtilis*  
175 submission was at least 1 gram, so all samples were grown in large enough volumes  
176 to exceed 1 gram of pelleted cells. The spread plate set up at the same time as the  
177 culture was used for quality assessment, to ensure no contamination had occurred.  
178 The samples were sent to the MicrobesNG facilities. There, for DNA extraction, 5 to  
179 45  $\mu$ l of the suspension was lysed with 120  $\mu$ l of TE buffer containing lysozyme (final  
180 concentration 0.1 mg/mL) and RNase A (ITW Reagents, Barcelona, Spain) (final  
181 concentration 0.1 mg/mL), incubated for 25 min at 37°C. Proteinase K (VWR  
182 Chemicals, Ohio, USA) (final concentration 0.1mg/mL) and SDS (Sigma-Aldrich,  
183 Missouri, USA) (final concentration 0.5% v/v) were added and incubated for 5 min at  
184 65°C. Genomic DNA was purified using an equal volume of SPRI beads and  
185 resuspended in EB buffer (Qiagen, Germany). DNA was quantified with the Quant-iT  
186 dsDNA HS kit (ThermoFisher Scientific) assay in an Eppendorf AF2200 plate reader  
187 (Eppendorf UK Ltd, United Kingdom). For Illumina sequencing, genomic DNA  
188 libraries were prepared using the Nextera XT Library Prep Kit (Illumina, San Diego,  
189 USA) following the manufacturer's protocol with the following modifications: input  
190 DNA was increased 2-fold, and PCR elongation time was increased to 45 s. DNA  
191 quantification and library preparation were carried out on a Hamilton Microlab STAR  
192 automated liquid handling system (Hamilton Bonaduz AG, Switzerland). Pooled  
193 libraries were quantified using the Kapa Biosystems Library Quantification Kit for  
194 Illumina. Libraries were sequenced using Illumina sequencers (HiSeq/NovaSeq)  
195 using a 250bp paired end protocol. Long read genomic DNA libraries were prepared  
196 with Oxford Nanopore SQK-RBK004 kit and/or SQK-LSK109 kit with Native  
197 Barcoding EXP-NBD104/114 (ONT, United Kingdom) using 400-500ng of HMW  
198 DNA. Barcoded samples were pooled together into a single sequencing library and  
199 loaded in a FLO-MIN106 (R.9.4.1) flow cell in a GridION (ONT, United Kingdom).

## 200 **Genome Assembly**

201 Illumina reads were adapter trimmed using Trimmomatic 0.30 with a sliding window  
202 quality cutoff of Q15 (22). An initial nanopore-only genome assembly was carried out  
203 using Flye 2.9.1 (23) with the ‘nano-raw’ model, and the resulting contigs used in  
204 conjunction with the Illumina reads with Unicycler v0.5.0 (24) using ‘bold’ mode to  
205 produce a final assembly. The resulting contigs were annotated using bakta 1.40  
206 (database version 3.1) (25). Examination of the assembly graphs allowed putative  
207 plasmid sequences to be identified in cases where short, circular molecules were  
208 evident which were not integrated into the chromosomal sequence. Raw sequence  
209 reads and annotated assemblies can be found under European Nucleotide Archive  
210 Project PRJEB43128.

## 211 **Phylogenetic tree construction**

212 The nucleotide sequences of *gyrA*, *rpoB*, *dnaJ* and *recA* were extracted from the  
213 short read data (which can be found in our previous publication (18)) using Artemis  
214 (26) and concatenated. The same sequences for the reference strain *B. subtilis*  
215 NCIB 3610 (Genbank accession number GCA\_002055965.1) were retrieved from  
216 NCBI, concatenated, and included in the analysis. The sequences were aligned in  
217 Jalview (27) by MAFFT using the G-INS-I algorithm and MEGA7 software (28) was  
218 used to construct a maximum likelihood phylogenetic tree with 100 bootstrap repeats  
219 as previously described (18).

## 220 **Pangenome analysis**

221 A pangenome analysis of all environmental isolates included in this work, the model  
222 isolate NCIB 3610 and other publicly available genome sequences of *B. subtilis*  
223 isolates was constructed using Roary version 3.13.0 with default parameters. The  
224 draft genome assemblies were used as the input. The pangenome figure was  
225 produced using the roary\_plots.py macro and further annotated in Adobe Illustrator  
226 (<https://adobe.com/products/illustrator>)

## 227 **Command line blast**

228 To explore the presence and distribution of the genes within the *epeXEPAB* cluster,  
229 command line blast was used to create a nucleotide database using the whole  
230 genomes of NCIB 3610 and the 21 genetically competent isolates in our collection.  
231 The database was then used to perform nucleotide blast searches of the *epe* genes.  
232 The outcome of the analysis and locations of genes of interest were used to



233 manually extract the sequences of interest. The sequences were aligned and  
234 exported as image files in Jalview (27) to explore the diversity in the coding  
235 sequences where required.

### 236 **antiSMASH**

237 To determine the secondary metabolite biosynthesis clusters encoded by each  
238 isolate, antiSMASH version 6.0 was used (29). Enhanced whole genome sequence  
239 assemblies were submitted to the server and run with default settings. Genbank files  
240 of all secondary metabolite biosynthesis clusters encoded by all isolates were  
241 retained.

### 242 **Clinker**

243 Clinker version 0.0.20 was used with default settings to visualise the secondary  
244 metabolite biosynthesis clusters identified by antiSMASH. The GenBank files of the  
245 clusters downloaded from antiSMASH were used as an input for clinker to produce  
246 figures. The figures were modified using Adobe Illustrator  
247 (<https://adobe.com/products/illustrator>).

## 248 **Results**

### 249 **Mixed biofilm intra-species competition and phylogenetic relatedness**

250 We examined the competitive outcome of the interaction between 21 genetically  
251 competent *B. subtilis* soil isolates and the model isolate NCIB 3610 in the context of  
252 a mixed isolate colony biofilm. In each case, we competed a variant of NCIB 3610  
253 that constitutively expresses mTagBFP against the GFP expressing variants of the  
254 soil isolates. We also included an NCIB 3610 isogenic mix as a control. We imaged  
255 the colony biofilms after 24, 48 and 72 hours of incubation at 30°C (Figure S1). We  
256 quantified the proportion of GFP-expressing cells in the mixed biofilm using image  
257 analysis methods (12) (Figure 1A). Analysis of the NCIB 3610 isogenic control  
258 revealed that the GFP variant typically comprises approximately 60% of the  
259 community. As a 1:1 ratio between GFP and mTagBFP variants of NCIB 3610 is  
260 expected, the slight under representation of the mTagBFP variant is perhaps due to  
261 differences in fitness associated with the different fluorescent proteins (Figure 1B).  
262 The underrepresentation of the strain carrying mTagBFP is consistent with our  
263 previous observations and did not preclude us from defining the relationships  
264 between the isolates (12).

265 The outcome of competition between the pairs of isolates shows that NCIB 3610 is a  
266 strong competitor that outcompetes most soil isolates from the 24h time point (Figure  
267 1B, Figure S1). It is also evident that, for isolate pairs where co-existence is  
268 observed at the 24h timepoint, the proportion of soil isolate in the community  
269 decreases overtime (Figure S1, Figure S2). Based on the outcome of their  
270 interaction with NCIB 3610 after 24 hours of co-incubation, we defined the isolates in  
271 our collection as “outcompeted” (those that took up 0% of the community),  
272 “dominated” (those that took up 0-5% of the community), “co-existing” (those that  
273 took up more than 5%) and “variable” (those that in some rounds were dominated  
274 and in others co-existed) (Figure 1B, Figure S2A) using custom thresholds.

275 *B. subtilis* intra-species interactions have primarily been studied in the context of kin  
276 discrimination, which is defined as the differential treatment of conspecific isolates  
277 based on phylogenetic relationship (6-8, 30-32). Therefore, we correlated the  
278 outcome of the mixed biofilm screens with a maximum likelihood tree based on the  
279 concatenated nucleotide sequences of four housekeeping genes (*gyrA*, *rpoB*, *recA*,  
280 *dnaJ*). Our results show there is a correlation between the ability of isolates to co-

281 exist with NCIB 3610 and how related the isolates are. All isolates that co-exist with  
282 NCIB 3610 are in the same phylogenetic group. Only one isolate of this group  
283 (namely NRS6202) fell within the class of isolates that were dominated by  
284 NCIB3610. The remaining two isolates that were in the “dominated” group, along  
285 with the two isolates that show “variable” results, are more distantly related to NCIB  
286 3610. All isolates that are “outcompeted” by NCIB 3610 form the most distantly  
287 related phylogenetic groups (Figure 1B). This analysis indicates that the outcome of  
288 the interactions between our isolates are broadly consistent with the concept of kin  
289 discrimination.

### 290 **Pangenome analysis of soil isolates of *B. subtilis***

291 The 21 isolates of *B. subtilis* used in this work have been isolated from soil samples  
292 in Scotland (18). To explore the genomic diversity of these isolates, we used short  
293 read sequence data (18) and performed a pangenome analysis using Roary (33).  
294 We included all the isolates in our collection (18) alongside other selected publicly  
295 accessible genomes to provide coverages of other geographic locations and  
296 isolation sources. The analysis shows that there is a large diversity in the accessory  
297 genes found within the isolates examined. Additionally, the phylogenetic distribution  
298 of the isolates in our collection is varied with isolates positioned within different  
299 clades (Figure 2). Importantly, the analysis shows that the isolates in our collection,  
300 while sampled locally, provide a good representation of the diversity found among  
301 more widely sampled *B. subtilis* isolates. To facilitate further bioinformatic analysis  
302 we acquired the enhanced whole genome sequences for the isolates (MicrobesNG,  
303 Birmingham, United Kingdom). After receiving the illumina reads and long read data,  
304 the genomes were quality assessed and re-assembled to incorporate our initial  
305 Illumina data (18) and consequently increase coverage (Table S2) (ENA Project  
306 PRJEB43128).

### 307 **Exploring the specialised metabolite biosynthesis clusters encoded by the** 308 **isolates in our collection**

309 To uncover the specialised metabolite biosynthesis clusters (SMBC) encoded by  
310 each of the isolates in our collection we used antiSMASH version 6.0 (29), a tool  
311 designed for mining bacterial genomes and detecting such clusters. We correlated  
312 the presence of SMBCs that have a known antimicrobial function with the  
313 competitive phenotype of our isolates (Figure 3). In some cases, sequence variations  
314 and truncations were found in SMBCs for a small subset of isolates (Figure 3, Figure

315 S3). The core clusters, a version of which was present in all isolates in our collection,  
316 are those required for the biosynthesis of bacillaene (34), plipastatin (35),  
317 bacillibactin (36), surfactin (37), subtilosin A (38) and bacilysin (39). One hypothesis  
318 is that the differential regulation of the core clusters could explain the competition  
319 outcome. However, here we focused on clusters that were not contained in all the  
320 genomes which produce metabolites with known antimicrobial properties, as we  
321 considered these likely to be involved in intra-species competition. The variable  
322 clusters encoded in our collection of *B. subtilis* isolates were those responsible for  
323 producing subtilomycin (40), sporulation killing factor (41-43), eipeptide (44, 45) and  
324 sublancin 168 (46, 47) (Figure 3, Table S3). Of these clusters we chose to further  
325 investigate the operon encoding for the eipeptide, as the presence of this cluster  
326 most closely correlated with a strong competitive phenotype (Figure 3). Only NCIB  
327 3610 and isolates that could survive in the presence of NCIB 3610 encoded the  
328 entire cluster.

### 329 **EpeX is a potential competition determinant**

330 The *epe* cluster of *B. subtilis* NCIB 3610 consists of *epeX*, *epeE*, *epeP*, *epeA* and  
331 *epeB* (Figure 4A). The variants of the cluster found within our isolate collection are  
332 presented (Figure 4A) and full details are provided (Table S4, Figure S4, Figure S5,  
333 Figure S6). EpeX has a toxic effect on the cell envelope of *B. subtilis* (45, 48). It is  
334 made as pre-pro-peptide in the cytoplasm that is processed by the radical-S-  
335 adenosyl-L-methionine (SAM) epimerase EpeE, which converts the L-valine and L-  
336 isoleucine of EpeX into their D-configured counterparts generating pre-EpeX (49).  
337 Pre-EpeX is further exported and cleaved, and based on the genomic arrangement,  
338 it is predicted that this is mediated by EpeP, a membrane anchored signal peptidase  
339 (44). Finally, EpeAB form an ABC transporter that confers partial resistance to the  
340 intrinsically produced EpeX and is involved in autoimmunity (48) (Figure 4B). The  
341 EpeX peptide triggers the activation of the LiaRS-dependent cell envelope stress  
342 response, and LiaH (phage heat shock protein) and Lial (membrane anchor) are  
343 additional major resistance determinants against the antimicrobial peptide.  
344 Consistent with the cell envelope stress response being involved in immunity against  
345 the eipeptide, the mode of action of EpeX is membrane depolarization which  
346 causes permeabilization of the membrane (45). This makes EpeX a likely candidate for  
347 a role in intra-species interactions and kin discrimination.

348 **Absence of the *epeXEPAB* cluster impacts competition against an otherwise**  
349 **isogenic strain**

350 To investigate if the *epeXEPAB* cluster has a role in shaping intra-species  
351 interactions in the context of mixed isolate colony biofilm, we constructed a variant of  
352 NCIB 3610 that lacks the entire *epeXEPAB* cluster. We tested the competitiveness  
353 of this mutant against NCIB 3610 in mixed isolate colony biofilms. From the single  
354 isolate controls, it is apparent that, at least on a macroscopic level, colony  
355 morphology is not impacted by an absence of the *epeXEPAB* cluster (Figure 5A). To  
356 determine the outcome of the competition between the strains in the mixed colony  
357 biofilms, we again used image analysis to quantify the proportion of GFP and  
358 mTagBFP expressing cells in the community that developed. Our results shown that  
359 the *epeXEPAB* mutant of NCIB 3610 is less successful than the wild type, as the  
360 proportion of the community it occupied is significantly lower than that taken up by  
361 the wild type in the isogenic control sample (Figure 5B and C). These data show that  
362 the *epeXEPAB* cluster is a determinant of the competition outcome in an otherwise  
363 isogenic biofilm co-culture. Lack of this cluster decreases the competitive strength of  
364 *B. subtilis* NCIB 3610.

365 **A limited role for EpeX as an intraspecies competition determinant**

366 Next, we explored how NCIB 3610 lacking the *epeXEPAB* cluster competed when  
367 mixed with the 21 soil isolates in our collection. We hypothesised that if EpeX is a  
368 competition determinant of intra-species interactions, then the lack of *epeXEPAB*  
369 would reduce the competitive fitness of NCIB 3610. This would allow for *a*) under  
370 representation of the NCIB 3610 *epeXEPAB* strain in cases where co-existence was  
371 achieved with the wild type, and/or *b*) isolates that are outcompeted or dominated by  
372 the wild NCIB 3610 managing to achieve some level of co-existence with the  
373 *epeXEPAB* mutant. We used an mTagBFP-expressing variant of NCIB 3610  
374 *epeXEPAB* as a reference strain, competing it against our suite of GFP- expressing  
375 isolates, and overlaid the data from this screen with the data obtained from the  
376 screen of all isolates against the wild type NCIB 3610 (recall Figure 1B). Our results  
377 show that for most of the isolates, the loss of the *epeXEPAB* cluster in NCIB 3610  
378 has no impact on the outcome of the pairwise competition (Figure 6A). The only  
379 isolate that takes up a larger portion of the community when mixed with the  
380 *epeXEPAB* mutant versus the wild type of NCIB 3610 is isolate NRS6153. To  
381 explore this relationship more closely, we further analysed the data and found that

382 there is a statistically significant difference between the portion of the community  
383 taken up by NRS6153 when mixed with the two variants of NCIB 3610 (Figure 6B).  
384 However, deletion of the *epeXEPAB* cluster in NRS6153 did not impact competition  
385 with its otherwise isogenic parental strain (Figure S7A). This was also the case for  
386 NRS6202 (Figure S7B). Collectively, our data uncover a role for EpeX as a  
387 competition determinant of *B. subtilis* intra-species interactions but reveal that the  
388 impact that EpeX has varies greatly depending on the competing isolate.

389



## 390 Discussion

391 In this study, we combined bioinformatic analysis and physiological experiments to  
392 identify a new competition determinant of *B. subtilis* intra-species interactions that is  
393 active within a spatially confined colony biofilm. By assessing genome data  
394 alongside the outcomes of pair-wise competitions of 21 soil isolates challenged  
395 against NCIB 3610, we found a correlation between isolates encoding the cluster  
396 responsible for producing the epeptide EpeX and competitive fitness. We  
397 hypothesised that this cluster was (in part) responsible for increasing the competitive  
398 fitness of isolates in a conspecific competition setting. To test our hypothesis, we  
399 deleted this cluster in NCIB 3610 and performed competitions of the mutant against  
400 both the wild type NCIB 3610 and our collection of soil isolates. We found that lack of  
401 the cluster responsible for EpeX production led to a decrease in competitive fitness  
402 in an otherwise isogenic context for NCIB 3610. When the variant of NCIB 3610  
403 lacking the *epe* cluster was competed against the rest of the isolates in the strain  
404 collection it displayed the same competitive strength as the parental isolate for 20 of  
405 the 21 isolates. The exception was isolate NRS6153 where it occupied a significantly  
406 larger portion of the mature colony biofilm community when mixed against the  
407 *epeXEPAB* mutant compared with its pairing with the wild type NCIB 3610.  
408 Additionally, looking beyond the model isolate NCIB 3610, when we deleted the  
409 *epeXEPAB* cluster in isolates NRS6153 and NRS6202, no impact on competitive  
410 fitness was observed.

411 The identification of EpeX as a competition determinant within the spatially confined  
412 colony biofilm is consistent with the cluster being expressed during biofilm formation.  
413 If the production of EpeX did not coincide with the conditions used, no impact of  
414 removing the molecule would be observed. Activity of the epeptide within a colony  
415 biofilm is also consistent with what is known about the expression profile of the *epe*  
416 operon. A critical regulator of biofilm matrix production and sporulation, Spo0A (50)  
417 relieves the repression of *epe* transcription via AbrB to allow EpeX to be produced  
418 (44). The reason why there is an isolate specific response to the presence of the  
419 epeptide between different isolates remains to be explored. One possible  
420 explanation is the fact that immunity against EpeX is not straight-forward and is  
421 largely achieved through activation of the broad cell envelope stress response,  
422 orchestrated by the LiaRS two components system (45, 48). Therefore, potential  
423 differences in the timing and combination of cell wall targeting competition

424 determinants under the conditions tested could result in various levels of  
425 susceptibility of target cells to EpeX and the observed differences in the impact that  
426 this molecule has on competition. One way to explore how NCIB 3610 induces  
427 LiaRS response in different isolates could be using transcriptional reporter fusions  
428 with the promoter of the LiaRS system in both isolates that are impacted by EpeX  
429 and those that are not.

### 430 **Overarching Conclusion**

431 Specialised metabolites are important determinants of social interactions among  
432 bacteria. While it is known that some specialised metabolites impact kin  
433 discrimination in the context of swarm meeting assays (8), it was unknown if and  
434 how different specialised metabolites affect the competitive strength of an isolate  
435 against conspecific isolates in a mixed biofilm. As biofilm formation is a very different  
436 physiological state to swarming (51) it is unknown if the molecules that affect mixing  
437 of swarms will be the same as those impacting competition in a biofilm setting.  
438 Additionally, the swarm meeting assays used previously to define the molecular  
439 determinants of kin discrimination (8) do not give any information about the  
440 competitive fitness of individual isolates, but rather just determine whether two  
441 strains can share a niche or not. In this work we addressed some of these  
442 knowledge gaps and revealed EpeX as a novel competition determinant, albeit with  
443 limited influence among other isolates.

444

445 **Acknowledgements**

446 Work in the NSW and CEM laboratories was funded by the Biotechnology and  
447 Biological Science Research Council (BBSRC) [BB/P001335/1, BB/R012415/1].  
448 M.K. was supported by a Biotechnology and Biological Sciences Research Council  
449 studentship [BB/M010996/1]. We are grateful to Joana Moreira Carneiro for her help  
450 with experimental work.

451 **Conflicts of Interests**

452 There are no conflicts of interest to report.

453

## 454 References

- 455 1. Hamilton WD. The genetical evolution of social behaviour. I. *Journal of*  
456 *theoretical biology*. 1964;7(1):1-16.
- 457 2. West SA, Griffin AS, Gardner A. Evolutionary explanations for cooperation.  
458 *Curr Biol*. 2007;17(16):R661-72.
- 459 3. Strassmann JE, Gilbert OM, Queller DC. Kin discrimination and cooperation in  
460 microbes. *Annu Rev Microbiol*. 2011;65:349-67.
- 461 4. Ho HI, Hirose S, Kuspa A, Shaulsky G. Kin recognition protects cooperators  
462 against cheaters. *Curr Biol*. 2013;23(16):1590-5.
- 463 5. Strassmann JE, Queller DC. Evolution of cooperation and control of cheating  
464 in a social microbe. *Proc Natl Acad Sci U S A*. 2011;108 Suppl 2(Suppl 2):10855-62.
- 465 6. Stefanic P, Belcijan K, Kraigher B, Kostanjsek R, Nesme J, Madsen JS, et al.  
466 Kin discrimination promotes horizontal gene transfer between unrelated strains in  
467 *Bacillus subtilis*. *Nature Communications*. 2021;12(1).
- 468 7. Stefanic P, Kraigher B, Lyons NA, Kolter R, Mandic-Mulec I. Kin  
469 discrimination between sympatric *Bacillus subtilis* isolates. *Proc Natl Acad Sci U S A*.  
470 2015;112(45):14042-7.
- 471 8. Lyons NA, Kraigher B, Stefanic P, Mandic-Mulec I, Kolter R. A Combinatorial  
472 Kin Discrimination System in *Bacillus subtilis*. *Curr Biol*. 2016;26(6):733-42.
- 473 9. Kearns DB. A field guide to bacterial swarming motility. *Nat Rev Microbiol*.  
474 2010;8(9):634-44.
- 475 10. Sansinenea E, Ortiz A. Secondary metabolites of soil *Bacillus* spp.  
476 *Biotechnology letters*. 2011;33(8):1523-38.
- 477 11. Kiesewalter HT, Lozano-Andrade CN, Wibowo M, Strube ML, Maroti G,  
478 Snyder D, et al. Genomic and Chemical Diversity of *Bacillus subtilis* Secondary  
479 Metabolites against Plant Pathogenic Fungi. *mSystems*. 2021;6(1).
- 480 12. Eigentler L, Kalamara M, Ball G, MacPhee CE, Stanley-Wall NR, Davidson  
481 FA. Founder cell configuration drives competitive outcome within colony biofilms.  
482 *ISME J*. 2022.
- 483 13. Eigentler L, Davidson FA, Stanley-Wall NR. Mechanisms driving spatial  
484 distribution of residents in colony biofilms: an interdisciplinary perspective. *Open*  
485 *Biol*. 2022;12(12):220194.
- 486 14. Kobayashi K. Diverse LXG toxin and antitoxin systems specifically mediate  
487 intraspecies competition in *Bacillus subtilis* biofilms. *PLoS Genet*.  
488 2021;17(7):e1009682.
- 489 15. Harwood CR, Cutting SM. Molecular biological methods for *Bacillus*. John  
490 Wiley & Sons Ltd. Chichester, England. 1990.
- 491 16. Verhamme DT, Kiley TB, Stanley-Wall NR. DegU co-ordinates multicellular  
492 behaviour exhibited by *Bacillus subtilis*. *Mol Microbiol*. 2007;65(2):554-68.
- 493 17. Konkol MA, Blair KM, Kearns DB. Plasmid-encoded ComI inhibits  
494 competence in the ancestral strain of *Bacillus subtilis*. *Journal of Bacteriology*. 2013.
- 495 18. Kalamara M, Abbott JC, MacPhee CE, Stanley-Wall NR. Biofilm  
496 hydrophobicity in environmental isolates of *Bacillus subtilis*. *Microbiology (Reading)*.  
497 2021;167(9).
- 498 19. Stanley NR, Britton RA, Grossman AD, Lazazzera BA. Identification of  
499 catabolite repression as a physiological regulator of biofilm formation by *Bacillus*  
500 *subtilis* by use of DNA microarrays. *J Bacteriol*. 2003;185(6):1951-7.
- 501 20. Gillespie RM, Stanley-Wall NR. Enzymes in action: an interactive activity  
502 designed to highlight positive attributes of extracellular enzymes synthesized by  
503 microbes. *Journal of microbiology & biology education*. 2014;15(2):310-2.

- 504 21. Allan C, Burel JM, Moore J, Blackburn C, Linkert M, Loynton S, et al.  
505 OMERO: flexible, model-driven data management for experimental biology. *Nat*  
506 *Methods*. 2012;9(3):245-53.
- 507 22. Bolger AM, Lohse M, Usadel B. Trimmomatic: a flexible trimmer for Illumina  
508 sequence data. *Bioinformatics*. 2014;30(15):2114-20.
- 509 23. Kolmogorov M, Yuan J, Lin Y, Pevzner PA. Assembly of long, error-prone  
510 reads using repeat graphs. *Nat Biotechnol*. 2019;37(5):540-6.
- 511 24. Wick RR, Judd LM, Gorrie CL, Holt KE. Unicycler: Resolving bacterial  
512 genome assemblies from short and long sequencing reads. *PLoS Comput Biol*.  
513 2017;13(6):e1005595.
- 514 25. Schwengers O, Jelonek L, Dieckmann MA, Beyvers S, Blom J, Goesmann A.  
515 Bakta: rapid and standardized annotation of bacterial genomes via alignment-free  
516 sequence identification. *Microb Genom*. 2021;7(11).
- 517 26. Carver T, Harris SR, Berriman M, Parkhill J, McQuillan JA. Artemis: an  
518 integrated platform for visualization and analysis of high-throughput sequence-based  
519 experimental data. *Bioinformatics*. 2012;28(4):464-9.
- 520 27. Waterhouse AM, Procter JB, Martin DM, Clamp M, Barton GJ. Jalview  
521 Version 2--a multiple sequence alignment editor and analysis workbench.  
522 *Bioinformatics*. 2009;25(9):1189-91.
- 523 28. Kumar S, Stecher G, Tamura K. MEGA7: Molecular Evolutionary Genetics  
524 Analysis Version 7.0 for Bigger Datasets. *Mol Biol Evol*. 2016;33(7):1870-4.
- 525 29. Blin K, Shaw S, Kloosterman AM, Charlop-Powers Z, van Wezel GP, Medema  
526 MH, et al. antiSMASH 6.0: improving cluster detection and comparison capabilities.  
527 *Nucleic Acids Res*. 2021.
- 528 30. Lyons NA, Kolter R. *Bacillus subtilis* Protects Public Goods by Extending Kin  
529 Discrimination to Closely Related Species. *MBio*. 2017;8(4).
- 530 31. Kraigher B, Butolen M, Stefanic P, Mandic Mulec I. Kin discrimination drives  
531 territorial exclusion during *Bacillus subtilis* swarming and restrains exploitation of  
532 surfactin. *ISME J*. 2022;16(3):833-41.
- 533 32. Kalamara M, Spacapan M, Mandic-Mulec I, Stanley-Wall NR. Social  
534 behaviours by *Bacillus subtilis*: quorum sensing, kin discrimination and beyond. *Mol*  
535 *Microbiol*. 2018;110(6):863-78.
- 536 33. Page AJ, Cummins CA, Hunt M, Wong VK, Reuter S, Holden MT, et al.  
537 Roary: rapid large-scale prokaryote pan genome analysis. *Bioinformatics*.  
538 2015;31(22):3691-3.
- 539 34. Patel PS, Huang S, Fisher S, Pirnik D, Aklonis C, Dean L, et al. Bacillaene, a  
540 novel inhibitor of procaryotic protein synthesis produced by *Bacillus subtilis*:  
541 production, taxonomy, isolation, physico-chemical characterization and biological  
542 activity. *J Antibiot (Tokyo)*. 1995;48(9):997-1003.
- 543 35. Umezawa H, Aoyagi T, Nishikiori T, Okuyama A, Yamagishi Y, Hamada M, et  
544 al. Plipastatins: new inhibitors of phospholipase A2, produced by *Bacillus cereus*  
545 BMG302-fF67. I. Taxonomy, production, isolation and preliminary characterization. *J*  
546 *Antibiot (Tokyo)*. 1986;39(6):737-44.
- 547 36. May JJ, Wendrich TM, Marahiel MA. The *dhb* operon of *Bacillus subtilis*  
548 encodes the biosynthetic template for the catecholic siderophore 2,3-  
549 dihydroxybenzoate-glycine-threonine trimeric ester bacillibactin. *Journal of Biological*  
550 *Chemistry*. 2001;276(10):7209-17.
- 551 37. Arima K, Kakinuma A, Tamura G. Surfactin, a crystalline peptidelipid  
552 surfactant produced by *Bacillus subtilis*: isolation, characterization and its inhibition  
553 of fibrin clot formation. *Biochemical and biophysical research communications*.  
554 1968;31(3):488-94.

- 555 38. Babasaki K, Takao T, Shimonishi Y, Kurahashi K. Subtilosin A, a new  
556 antibiotic peptide produced by *Bacillus subtilis* 168: isolation, structural analysis, and  
557 biogenesis. *J Biochem.* 1985;98(3):585-603.
- 558 39. Kenig M, Abraham EP. Antimicrobial activities and antagonists of bacilysin  
559 and anticapsin. *Journal of general microbiology.* 1976;94(1):37-45.
- 560 40. Phelan RW, Barret M, Cotter PD, O'Connor PM, Chen R, Morrissey JP, et al.  
561 Subtilomycin: a new lantibiotic from *Bacillus subtilis* strain MMA7 isolated from the  
562 marine sponge *Haliclona simulans*. *Mar Drugs.* 2013;11(6):1878-98.
- 563 41. Allenby NE, Watts CA, Homuth G, Pragai Z, Wipat A, Ward AC, et al.  
564 Phosphate starvation induces the sporulation killing factor of *Bacillus subtilis*. *J*  
565 *Bacteriol.* 2006;188(14):5299-303.
- 566 42. Fawcett P, Eichenberger P, Losick R, Youngman P. The transcriptional profile  
567 of early to middle sporulation in *Bacillus subtilis*. *Proceedings National Academy*  
568 *Sciences USA.* 2000;97(14):8063-8.
- 569 43. Molle V, Fujita M, Jensen ST, Eichenberger P, Gonzalez-Pastor JE, Liu JS, et  
570 al. The Spo0A regulon of *Bacillus subtilis*. *Mol Microbiol.* 2003;50(5):1683-701.
- 571 44. Popp PF, Friebel L, Benjdia A, Guillot A, Berteau O, Mascher T. The  
572 Epipeptide Biosynthesis Locus epeXEPAB Is Widely Distributed in Firmicutes and  
573 Triggers Intrinsic Cell Envelope Stress. *Microb Physiol.* 2021.
- 574 45. Popp PF, Benjdia A, Strahl H, Berteau O, Mascher T. The Epipeptide YydF  
575 Intrinsically Triggers the Cell Envelope Stress Response of *Bacillus subtilis* and  
576 Causes Severe Membrane Perturbations. *Frontiers in microbiology.* 2020;11:151.
- 577 46. Paik SH, Chakicherla A, Hansen JN. Identification and characterization of the  
578 structural and transporter genes for, and the chemical and biological properties of,  
579 sublancin 168, a novel lantibiotic produced by *Bacillus subtilis* 168. *Journal of*  
580 *Biological Chemistry.* 1998;273(36):23134-42.
- 581 47. Dorenbos R, Stein T, Kabel J, Bruand C, Bolhuis A, Bron S, et al. Thiol-  
582 disulfide oxidoreductases are essential for the production of the lantibiotic sublancin  
583 168. *J Biol Chem.* 2002;277(19):16682-8.
- 584 48. Butcher BG, Lin YP, Helmann JD. The yydFGHIJ operon of *Bacillus subtilis*  
585 encodes a peptide that induces the LiaRS two-component system. *J Bacteriol.*  
586 2007;189(23):8616-25.
- 587 49. Benjdia A, Guillot A, Ruffie P, Leprince J, Berteau O. Post-translational  
588 modification of ribosomally synthesized peptides by a radical SAM epimerase in  
589 *Bacillus subtilis*. *Nat Chem.* 2017;9(7):698-707.
- 590 50. Hamon MA, Lazazzera BA. The sporulation transcription factor Spo0A is  
591 required for biofilm development in *Bacillus subtilis*. *Mol Microbiol.* 2001;42(5):1199-  
592 209.
- 593 51. Kearns DB, Chu F, Branda SS, Kolter R, Losick R. A master regulator for  
594 biofilm formation by *Bacillus subtilis*. *Mol Microbiol.* 2005;55(3):739-49.

595



596 **Table 1** – Strains used in this study

| Strain    | Code Name <sup>a</sup> | Genotype <sup>b</sup>                           | Source <sup>c</sup>         |
|-----------|------------------------|-------------------------------------------------|-----------------------------|
| NCIB 3610 |                        | Wild type                                       | B.G.S.C.                    |
| 168       |                        | <i>trpC2</i>                                    | B.G.S.C.                    |
| NRS6220   | NRS6103g               | NRS6103 <i>amyE::Phy-spank-gfp mut2 (cml)</i>   | pBL165 into NRS6103         |
| NRS6221   | NRS6105g               | NRS6105 <i>amyE::Phy-spank-gfp mut2 (cml)</i>   | pBL165 into NRS6105         |
| NRS6222   | NRS6153g               | NRS6153 <i>amyE::Phy-spank-gfp mut2 (cml)</i>   | pBL165 into NRS6153         |
| NRS6223   | NRS6096g               | NRS6096 <i>amyE::Phy-spank-gfp mut2 (cml)</i>   | pBL165 into NRS6096         |
| NRS6881   | NRS6085g               | NRS6085 <i>amyE::Phy-spank-gfp mut2 (cml)</i>   | pBL165 into NRS6085         |
| NRS6882   | NRS6099g               | NRS6099 <i>amyE::Phy-spank-gfp mut2 (cml)</i>   | pBL165 into NRS6099         |
| NRS6883   | NRS6107g               | NRS6107 <i>amyE::Phy-spank-gfp mut2 (cml)</i>   | pBL165 into NRS6107         |
| NRS6884   | NRS6116g               | NRS6116 <i>amyE::Phy-spank-gfp mut2 (cml)</i>   | pBL165 into NRS6116         |
| NRS6885   | NRS6118g               | NRS6118 <i>amyE::Phy-spank-gfp mut2 (cml)</i>   | pBL165 into NRS6118         |
| NRS6886   | NRS6121g               | NRS6121 <i>amyE::Phy-spank-gfp mut2 (cml)</i>   | pBL165 into NRS6121         |
| NRS6887   | NRS6127g               | NRS6127 <i>amyE::Phy-spank-gfp mut2 (cml)</i>   | pBL165 into NRS6127         |
| NRS6888   | NRS6128g               | NRS6128 <i>amyE::Phy-spank-gfp mut2 (cml)</i>   | pBL165 into NRS6128         |
| NRS6889   | NRS6132g               | NRS6132 <i>amyE::Phy-spank-gfp mut2 (cml)</i>   | pBL165 into NRS6132         |
| NRS6890   | NRS6145g               | NRS6145 <i>amyE::Phy-spank-gfp mut2 (cml)</i>   | pBL165 into NRS6145         |
| NRS6891   | NRS6160g               | NRS6160 <i>amyE::Phy-spank-gfp mut2 (cml)</i>   | pBL165 into NRS6160         |
| NRS6892   | NRS6181g               | NRS6181 <i>amyE::Phy-spank-gfp mut2 (cml)</i>   | pBL165 into NRS6181         |
| NRS6893   | NRS6183g               | NRS6183 <i>amyE::Phy-spank-gfp mut2 (cml)</i>   | pBL165 into NRS6183         |
| NRS6894   | NRS6186g               | NRS6186 <i>amyE::Phy-spank-gfp mut2 (cml)</i>   | pBL165 into NRS6186         |
| NRS6895   | NRS6187g               | NRS6187 <i>amyE::Phy-spank-gfp mut2 (cml)</i>   | pBL165 into NRS6187         |
| NRS6896   | NRS6190                | NRS6190 <i>amyE::Phy-spank-gfp mut2 (cml)</i>   | pBL165 into NRS6190         |
| NRS6897   | NRS6202g               | NRS6202 <i>amyE::Phy-spank-gfp mut2 (cml)</i>   | pBL165 into NRS6202         |
| NRS6931   |                        | 168 <i>amyE::Phy-spank-mTagBFP (spec)</i>       | pNW2304 into 168            |
| NRS6932   | NCIB 3610b             | NCIB 3610 <i>amyE::Phy-spank-mTagBFP (spec)</i> | NRS6931 SPP1 into NCIB 3610 |
| NRS6900   |                        | 168 <i>amyE::Phy-spank-gfp mut2 (cml)</i>       | pBL165 into 168             |
| NRS6942   | NCIB 3610g             | NCIB 3610 <i>amyE::Phy-spank-gfp mut2 (cml)</i> | NRS6900 SPP1 into NCIB 3610 |
| NRS6934   | NRS6096b               | NRS6096 <i>amyE::Phy-spank-mTagBFP (spec)</i>   | pNW2304 into NRS6096        |
| NRS6935   | NRS6103b               | NRS6103 <i>amyE::Phy-spank-mTagBFP (spec)</i>   | pNW2304 into NRS6103        |
| NRS6936   | NRS6105b               | NRS6105 <i>amyE::Phy-spank-mTagBFP (spec)</i>   | pNW2304 into NRS6105        |
| NRS6937   | NRS6118b               | NRS6118 <i>amyE::Phy-spank-mTagBFP (spec)</i>   | pNW2304 into NRS6118        |
| NRS6938   | NRS6153b               | NRS6153 <i>amyE::Phy-spank-mTagBFP (spec)</i>   | pNW2304 into NRS6153        |
| NRS6943   | NRS6085b               | NRS6085 <i>amyE::Phy-spank-mTagBFP (spec)</i>   | pNW2304 into NRS6085        |
| NRS6944   | NRS6099b               | NRS6099 <i>amyE::Phy-spank-mTagBFP (spec)</i>   | pNW2304 into NRS6099        |
| NRS6945   | NRS6107b               | NRS6107 <i>amyE::Phy-spank-mTagBFP (spec)</i>   | pNW2304 into NRS6107        |
| NRS6946   | NRS6116b               | NRS6116 <i>amyE::Phy-spank-mTagBFP (spec)</i>   | pNW2304 into NRS6116        |
| NRS6947   | NRS6121b               | NRS6121 <i>amyE::Phy-spank-mTagBFP (spec)</i>   | pNW2304 into NRS6121        |
| NRS6948   | NRS6127b               | NRS6127 <i>amyE::Phy-spank-mTagBFP (spec)</i>   | pNW2304 into NRS6127        |
| NRS6949   | NRS6128b               | NRS6128 <i>amyE::Phy-spank-mTagBFP (spec)</i>   | pNW2304 into NRS6128        |
| NRS6950   | NRS6132b               | NRS6132 <i>amyE::Phy-spank-mTagBFP (spec)</i>   | pNW2304 into NRS6132        |
| NRS6951   | NRS6145b               | NRS6145 <i>amyE::Phy-spank-mTagBFP (spec)</i>   | pNW2304 into NRS6145        |

| Strain  | Code Name <sup>a</sup> | Genotype <sup>b</sup>                                         | Source <sup>c</sup>       |
|---------|------------------------|---------------------------------------------------------------|---------------------------|
| NRS6952 | NRS6160b               | NRS6160 <i>amyE::Phy-spank-mTagBFP (spec)</i>                 | pNW2304 into NRS6160      |
| NRS6953 | NRS6181b               | NRS6181 <i>amyE::Phy-spank-mTagBFP (spec)</i>                 | pNW2304 into NRS6181      |
| NRS6954 | NRS6183b               | NRS6183 <i>amyE::Phy-spank-mTagBFP (spec)</i>                 | pNW2304 into NRS6183      |
| NRS6955 | NRS6186b               | NRS6186 <i>amyE::Phy-spank-mTagBFP (spec)</i>                 | pNW2304 into NRS6186      |
| NRS6956 | NRS6187b               | NRS6187 <i>amyE::Phy-spank-mTagBFP (spec)</i>                 | pNW2304 into NRS687       |
| NRS6957 | NRS6190b               | NRS6190 <i>amyE::Phy-spank-mTagBFP (spec)</i>                 | pNW2304 into NRS6190      |
| NRS6958 | NRS620b                | NRS6202 <i>amyE::Phy-spank-mTagBFP (spec)</i>                 | pNW2304 into NRS6202      |
| NRS7253 |                        | 168 <i>epeXEPAB::kan</i>                                      | pNW2315 into 168          |
| NRS7259 | 3610g epe              | NCIB 3610 <i>epeXEPAB::kan amyE::Phy-spank-gfp mut2 (cml)</i> | NRS7253 SPP1 into NRS6942 |
| NRS760  | 3610b epe              | NCIB 3610 <i>epeXEPAB::kan amyE::Phy-spank-mTagBFP (spec)</i> | NRS7253 SPP1 into NRS6932 |
| NRS7390 | NRS6153g epe           | NRS6153 <i>epeXEPAB::kan amyE::Phy-spank-gfp mut2 (cml)</i>   | pNW2315 into NRS6222      |
| NRS7391 | NRS6202g epe           | NRS6202 <i>epeXEPAB::kan amyE::Phy-spank-gfp mut2 (cml)</i>   | pNW2315 into NRS6897      |
| NRS7392 | NRS6153b epe           | NRS6153 <i>epeXEPAB::kan amyE::Phy-spank-mTagBFP (spec)</i>   | pNW2319 into NRS6938      |
| NRS7393 | NRS6202b epe           | NRS6202 <i>epeXEPAB::kan amyE::Phy-spank-mTagBFP (spec)</i>   | pNW2319 into NRS7201      |

597

598 **a** The naming given to strains in figures and figure legends is indicated

599 **b** The abbreviation “spec” indicates spectinomycin resistance; “cml” indicates  
600 chloramphenicol resistance and “kan” kanamycin resistance.

601 **c** The method of strain construction is indicated with either the plasmid (pNW) or  
602 donor strain phage (SPP1) inserted into the parental strain.

603

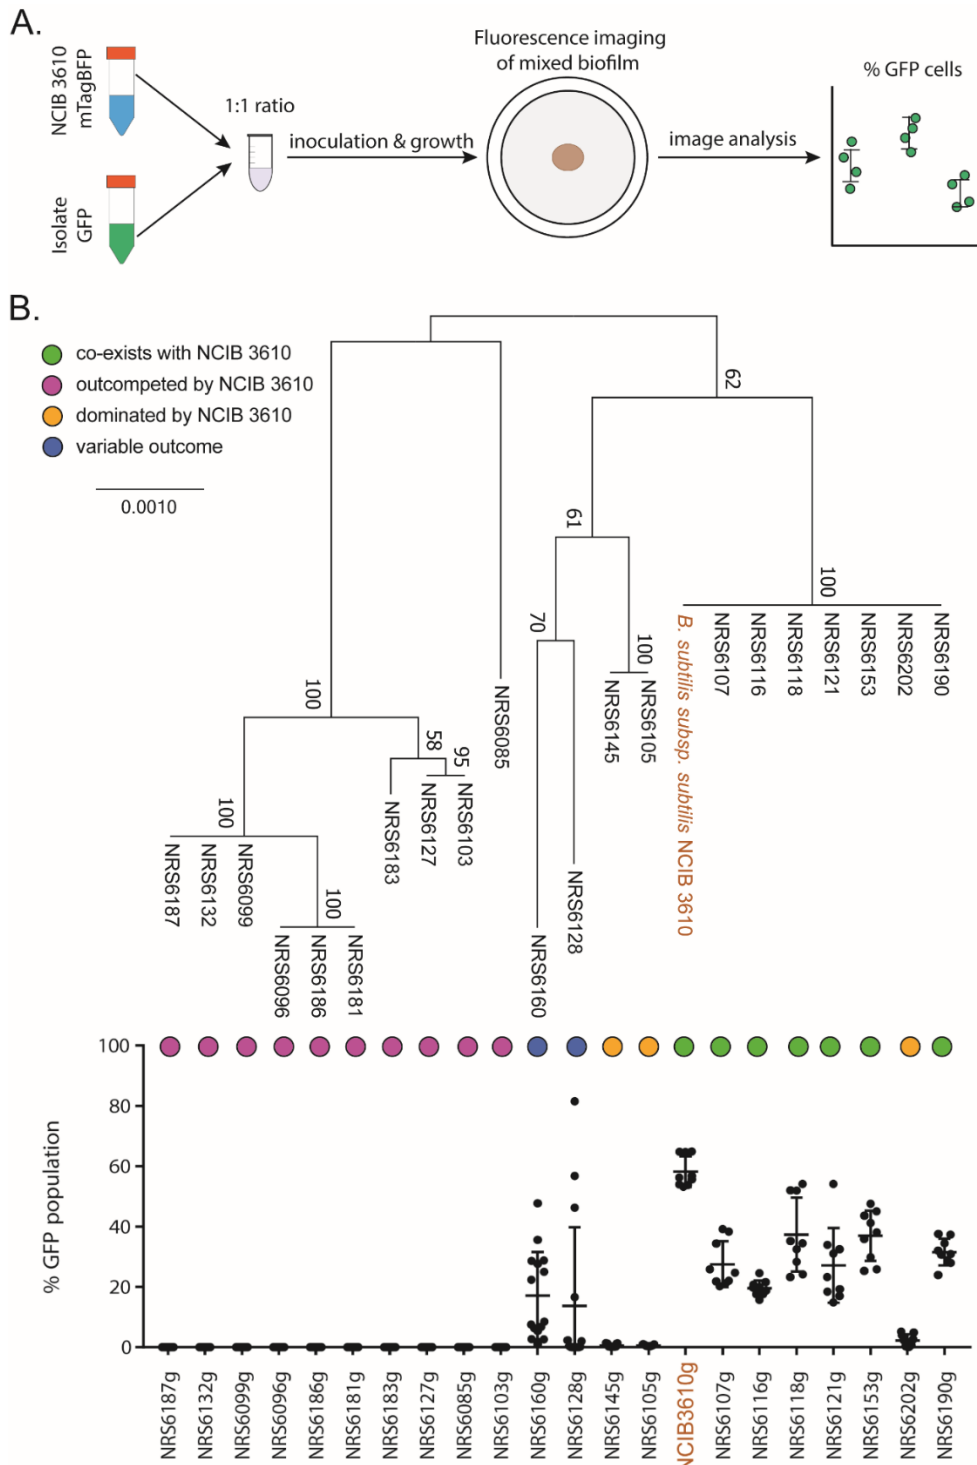

604

605

606 **Figure 1: Mixed biofilm intra-species competition outcomes of *B. subtilis* isolates against the**  
 607 **model NCIB 3610.** (A) Schematic representation of mixed biofilm setup. (B) Maximum likelihood  
 608 phylogenetic tree based on the concatenated sequences of housekeeping genes *gyrA*, *rpoB*, *dnaJ*,  
 609 *recA* shown alongside the competition outcomes of mixed biofilms of NCIB 3610 co-incubated with  
 610 each of the 21 environmental isolates of *B. subtilis* used in this work. The presented values are the %  
 611 of the community of GFP expressing soil isolates, quantified using image analysis. The nine data  
 612 points presented for each isolate represent three biological repeats and three technical repeats. The  
 613 error bars represent the standard deviation of the mean.

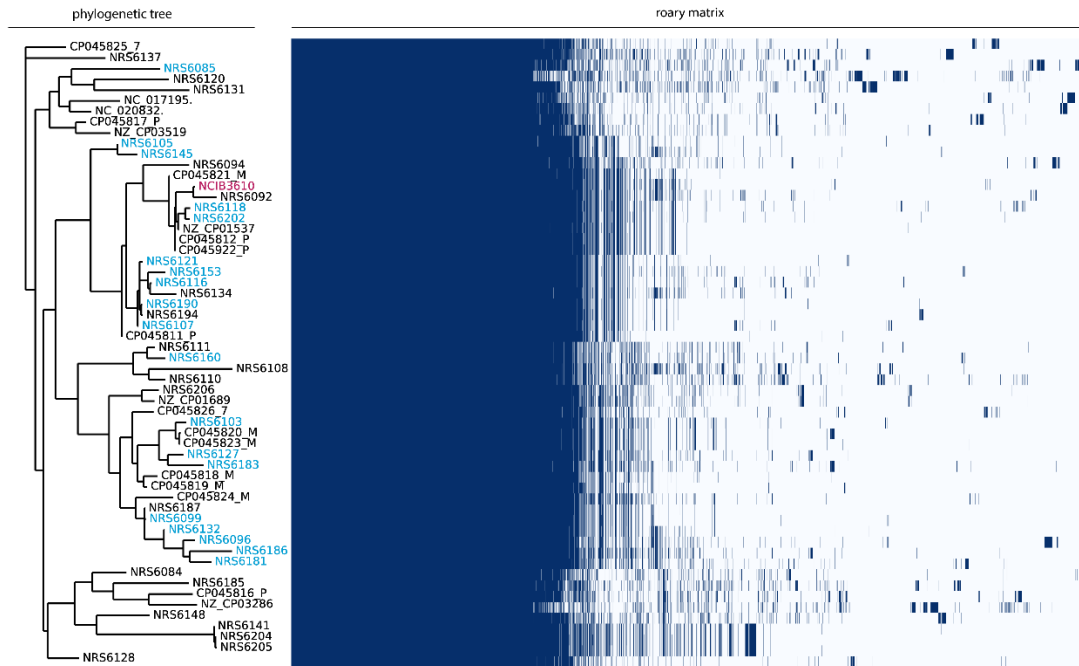

614

615 **Figure 2: Pangenome analysis and phylogeny of *B. subtilis* isolates.** The names of genetically  
616 competent soil isolates from the NSW laboratory are coloured in blue on the phylogenetic tree shown  
617 on the left. Non-competent isolates in the NSW lab collection and publicly accessible genomes from  
618 diverse sources are coloured in black. The model isolate NCIB 3610 is shown in pink. The roary  
619 matrix shows the presence (blue) and absence (white) of genes in each isolate.

620

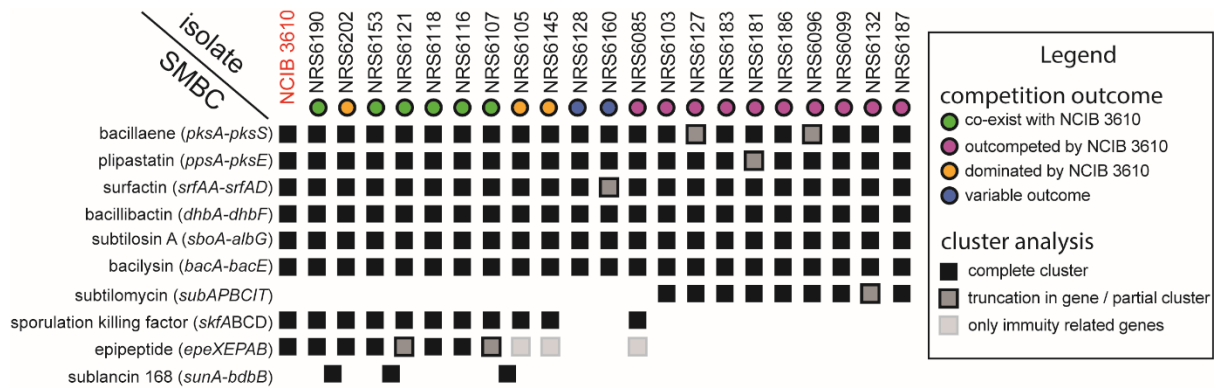

621

622 **Figure 3: Secondary metabolite biosynthesis clusters and competitive fitness of soil isolates**  
 623 **of *B. subtilis*.** The specialised metabolites on the left-hand side represent the molecules encoded by  
 624 each cluster identified by antiSMASH (29). The NCIB 3610 and numbers followed by “NRS” at the top  
 625 represent different isolates used in this study. The outcomes of competitions in biofilms are indicated  
 626 by coloured circles. This data is presented in Figure 1B and are as shown in the legend. The coloured  
 627 squares show the presence and any variations in the encoded clusters and what they represent is  
 628 shown in the legend.

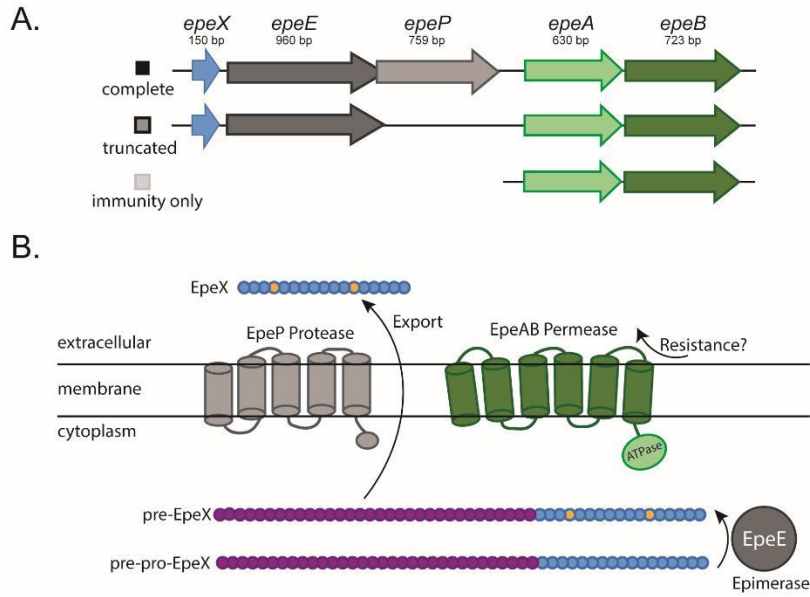

629

630

631 **Figure 4: EpeX as a potential competition determinant of intra-species interactions.** (A)

632 Schematic representation of the variants of the *epeXEPAB* found in the genomes of the isolates used

633 in this work. The coloured boxes next to each cluster schematic identify the cluster variant; (B)

634 schematic representation of the components and function of EpeXEPAB. Amino acids coloured in

635 yellow for the pre-EpeX indicate amino acids epimerised by EpeE prior to being cleaved and is

636 presumably further processed and exported from the cell. The processing and export are thought to

637 be mediated by the EpeP protease to generate the final form, EpeX. The EpeAB permease is

believed to be involved in immunity against EpeX. The schematic has been adapted from (44).



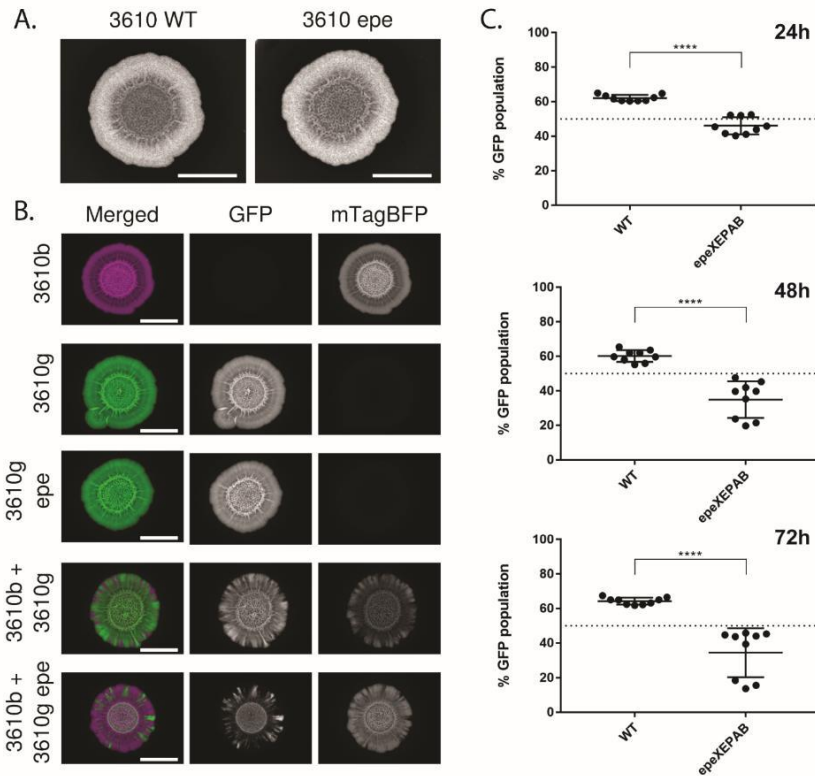

638

639 **Figure 5: Competition assay outcome between NCIB 3610 wild type and *epeXEPAB* mutants.**  
 640 (A) Representative images of single strain biofilms of the wild type (“WT”) and *epeXEPAB* (“epe”)  
 641 mutant of NCIB 3610 (“3610”) grown on MSgg media for 48 hours at 30°C. The scale bars represent  
 642 0.5 cm. (B) representative images of biofilms growth for 48 hours at 30°C on MSgg agar. “3610” is the  
 643 model isolate NCIB 3610. Strain names followed by “b” represent strains constitutively expressing  
 644 mTagBFP, false coloured in magenta and names followed by “g” represent strains constitutively  
 645 expressing GFP and are false coloured in green. “epe” represents deletion of the *epeXEPAB* operon.  
 646 “3610b” and “3610g epe” are images of the same biofilms as those shown in (A). The scale bars  
 647 represent 0.5 cm. (C) Competition results of NCIB 3610 wild type expressing mTagBFP (NRS6932)  
 648 against GFP-expressing wild type (NRS6942) or *epeXEPAB* mutant (NRS7259) of NCIB 3610 as  
 649 indicated after 24, 48 and 72 hours of co-incubation on biofilm inducing media plates as indicated.  
 650 The presented values are the % of the community of GFP expressing strain, quantified using image  
 651 analysis. Each individual data point presented for each isolate represent one of two or three technical  
 652 replicates for the three biological repeats performed. The error bars represent the standard deviation  
 653 of the mean. The asterisks represent statistical significance with a p value of  $\leq 0.0001$  between the  
 654 two populations as calculated using an unpaired t test.

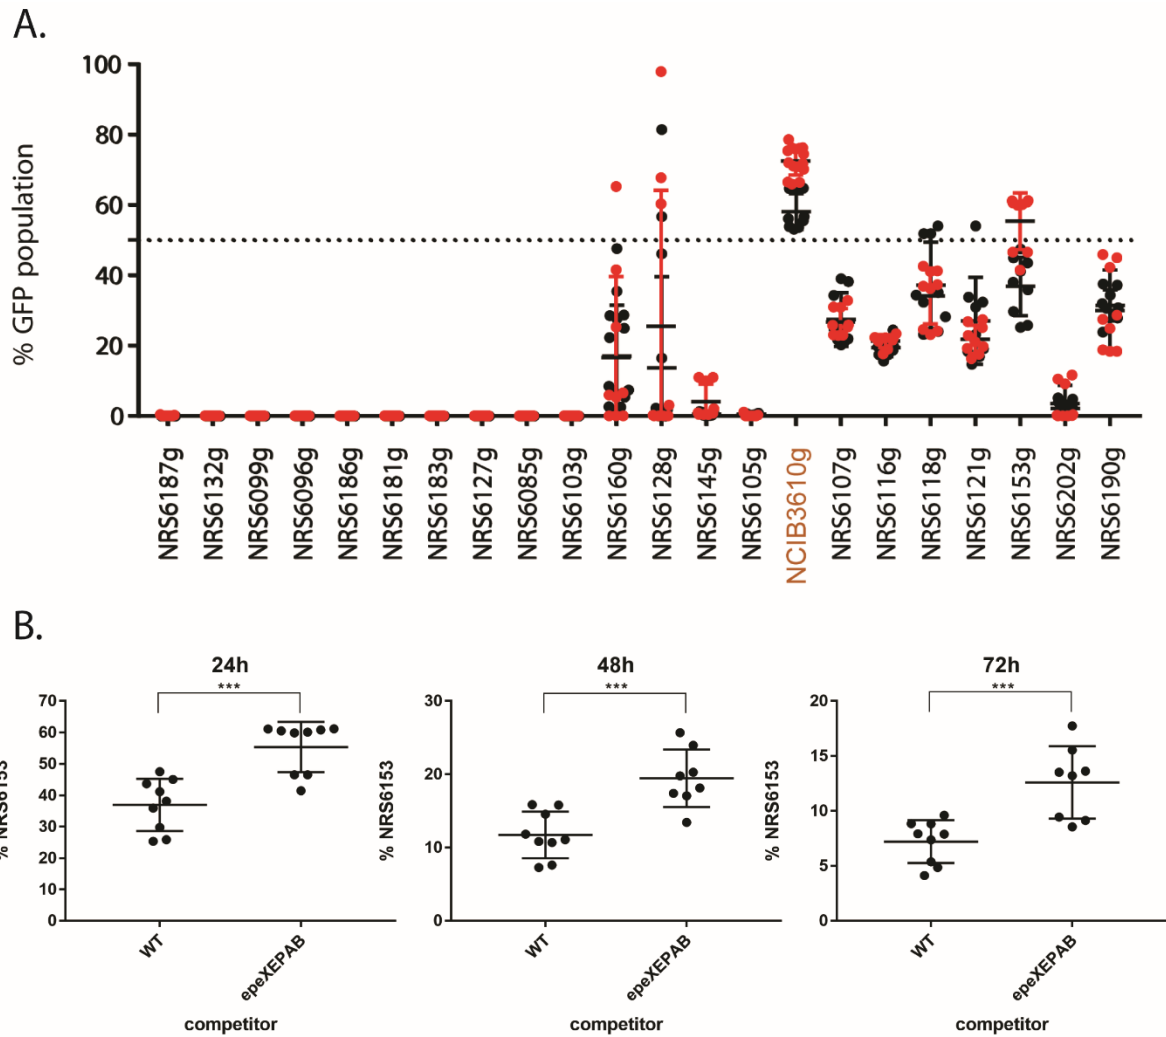

655

656 **Figure 6: comparison of mixed biofilm outcomes using NCIB 3610 wild type and *epeXEPAB* as**  
 657 **references.** (A) Competition results of NCIB 3610 wild type (WT) expressing mTagBFP (NRS6932,  
 658 black data points) or NCIB 3610 *epeXEPAB* expressing mTagBFP (NRS7260, red data points)  
 659 against GFP-expressing soil isolates at 24 hours of co-incubation on biofilm inducing media plates as  
 660 indicated. The presented values are the % of the community of GFP expressing soil isolates,  
 661 quantified using image analysis. Each individual data point presented for each isolate represent one  
 662 of two or three technical replicates for three biological repeats with each reference strain as indicated.  
 663 The error bars represent the standard deviation of the mean (B) Competition results of GFP -  
 664 expressing NRS6153 (NRS622) against *mTagBFP*-expressing wild type (NRS6932) or *epeXEPAB*  
 665 mutants (NRS7260) of NCIB 3610 after 24, 48 and 72 hours of co-incubation on biofilm inducing  
 666 media plates as indicated. The presented values are the % of the community of GFP expressing  
 667 strain (NRS6153), quantified using image analysis. Each individual data point presented for each  
 668 isolate represent one of two or three technical replicates for the three biological repeats performed.  
 669 The error bars represent the standard deviation of the mean. The asterisks represent statistical  
 670 significance with a p value of  $\leq 0.001$  between the two populations as calculated using an unpaired t  
 671 test.

672

673

674 **CRedit**

675

| Term                       | Definition                                                                                                                                                                                                    | Initials             |
|----------------------------|---------------------------------------------------------------------------------------------------------------------------------------------------------------------------------------------------------------|----------------------|
| Conceptualization          | Ideas; formulation or evolution of overarching research goals and aims                                                                                                                                        | MK, NSW, CEM         |
| Methodology                | Development or design of methodology; creation of models                                                                                                                                                      | MK, NSW, CEM, JA     |
| Software                   | Programming, software development; designing computer programs; implementation of the computer code and supporting algorithms; testing of existing code components                                            | JA                   |
| Validation                 | Verification, whether as a part of the activity or separate, of the overall replication/ reproducibility of results/experiments and other research outputs                                                    | N/A                  |
| Formal analysis            | Application of statistical, mathematical, computational, or other formal techniques to analyze or synthesize study data                                                                                       | MK, NSW              |
| Investigation              | Conducting a research and investigation process, specifically performing the experiments, or data/evidence collection                                                                                         | N/A                  |
| Resources                  | Provision of study materials, reagents, materials, patients, laboratory samples, animals, instrumentation, computing resources, or other analysis tools                                                       | TS, MK, JA           |
| Data Curation              | Management activities to annotate (produce metadata), scrub data and maintain research data (including software code, where it is necessary for interpreting the data itself) for initial use and later reuse | MK, JA               |
| Writing - Original Draft   | Preparation, creation and/or presentation of the published work, specifically writing the initial draft (including substantive translation)                                                                   | MK, NSW              |
| Writing - Review & Editing | Preparation, creation and/or presentation of the published work by those from the original research group, specifically critical review, commentary or revision – including pre-or postpublication stages     | MK, TS, CEM, JA, NSW |
| Visualization              | Preparation, creation and/or presentation of the published work, specifically visualization/ data presentation                                                                                                | MK, NSW              |
| Supervision                | Oversight and leadership responsibility for the research activity planning and execution, including mentorship external to the core team                                                                      | NSW                  |
| Project administration     | Management and coordination responsibility for the research activity planning and execution                                                                                                                   | MK                   |
| Funding acquisition        | Acquisition of the financial support for the project leading to this publication                                                                                                                              | NSW, CEM             |

676

677
